or newest—but at least 70 years old according to my calculations.

### References

1. Betcher AM, Ciliberti BJ, Wood PM, et al: Fifty years of organized anesthesiology. *JAMA* 159:766, 1955
2. Bonner TN: The social and political attitudes of midwestern physicians, 1840-1940. *J Hist Med* 8:133, 1953
3. Clarke E (editor): *Modern Methods in the History of Medicine*. London, Athlone Press, 1971
4. Duncum BM: *The Development of Inhalation Anaesthesia*. London, Oxford University Press, 1947
5. Edgar II: Modern surgery and Lord Lister. *J Hist Med* 16:145, 1961
6. Galdston I: The birth and death of specialties. *JAMA* 167:2056, 1958
7. Gillespie NA: Ralph Milton Waters: A brief biography. *Br J Anaesth* 21:198, 1949
8. Lambert AR: *The Presbyterian Hospital and the Columbia-Presbyterian Medical Center, 1868-1943*. New York, Columbia University Press, 1955
9. McMechan FH: E. I. McKesson, anesthetist. His life and work. *Anesth Analg* (Cleve) 16:1, 1937
10. Merton RK: Singletons and multiples in scientific discovery: A chapter in the sociology of science. *Proc Am Phil Soc* 105:470-471, 1961
11. Ranney O: Francis Hoeffer McMechan. His life and work. *Anesth Analg* (Cleveland) (suppl) 18, 1939
12. Rosen G: The new history of medicine. *Hist Med* 6:516, 1951
13. Rosenberg CE: The medical profession, medical practice and the history of medicine. *Op. cit.* 3, chapter 2
14. Shyrock RH: *American Medical Research*. New York, Commonwealth Fund, 1947
15. Sigerist HE: Surgery before anesthesia. *Bull School Med U Maryland*, 31:116, 1947
16. Taylor IB: Progress and development of anesthesia in the United States. *Am J Med Sci* 216:121, 1948
17. Temkin O: The historiography of ideas in medicine. *Op. cit.* 3, chapter 1
18. Vandam LD: Walter M. Boothby—The well springs of anesthesiology. *N Engl J Med* 276:558, 1967
19. Waters RM: The evolution of anesthesia. *Proc Staff Meet Mayo Clin*, I, p 428, July 15, 1941. II, p 440, July 29, 1942
20. Waters RM: The development of anesthesiology in the United States: Personal observations 1913-1946. *J Hist Med* 1:595, 1946
21. Wells JW, McMechan FH: Presidential Address, International Anaesthesia Research Society, September 1947

### Blood Transfusion

**FILTERS AND BLOOD TRANSFUSION** Two types of cardiopulmonary bypass filters were evaluated for their effectiveness as blood filters. Samples from nine units of 21-23-day-old ACD bank blood were forced at a constant flow rate through a fixed area of a nickel mesh screen (20- $\mu$  pore size) before and after passage through the filters. The amount of debris retained was determined by weighing. The screen entrapped 0.90 to 3.20 mg/ml (mean 1.54 mg/ml) of debris from unfiltered blood, 0.50 to 0.89 mg/ml (mean 0.69 mg/ml) after passage through a polyester filter, and 0.01 to 0.03 mg/ml (mean 0.02 mg/ml) after passage through a Dacron wool filter. (McNamara, J. J., Burran, E. L., and Suehiro, G.: *Effective Filtration of Banked Blood, Surgery* 71: 594-597, 1972.)

**ABSTRACTER'S COMMENT:** Both Pall (polyester) and Swank (Dacron wool) filters are now available in models appropriate for use during blood transfusion. Although it is now possible to remove a substantial amount of detritus, we need more information on allowable levels that will not alter function in the lung, the *in-vivo* filter commonly used.
